# Supplementary material for: Synthesis and anticancer evaluation of [ d -Ala]-nocardiotide A
Source: Royal Society of Chemistry journal article supplement (doi:10.1039/d4ra00025k), 2024-01-01
Supplement: d4ra00025k1.pdf [file d4ra00025k1.pdf]

## Synthesis of [D-Ala]-Nocardiotide A and Its Anticancer Evaluation

Rani Maharani,<sup>a,b,c,\*</sup> Muhamad Imam Muhajir,<sup>a</sup> Jelang Muhammad Dirgantara,<sup>a,d</sup> Ari Hardianto,<sup>a</sup> Tri Mayanti,<sup>a,c</sup>  
Desi Harneti,<sup>a,c</sup> Nurlelasari,<sup>a,c</sup> Kindi Farabi,<sup>a,b,c</sup> Ace Tatang Hidayat,<sup>a,b,c</sup> Unang Supratman,<sup>a,b,c</sup> Teruna Siahaan<sup>e,\*</sup>

<sup>1</sup>Department of Chemistry, Faculty of Mathematics and Natural Sciences, Universitas Padjadjaran, Jalan Raya Bandung-Sumedang KM 21 Jatinangor 45363, West Java, Indonesia.

<sup>2</sup>Central Laboratory, Universitas Padjadjaran, Jalan Raya Bandung-Sumedang KM 21 Jatinangor 45363, West Java, Indonesia.

<sup>3</sup>Centre of Natural Products and Synthesis Studies, Faculty of Mathematics and Natural Sciences, Universitas Padjadjaran, Jalan Raya Bandung-Sumedang KM 21 Jatinangor 45363, West Java, Indonesia.

<sup>4</sup>Department of Chemistry, Graduate School of Science, Osaka University, Toyonaka, Osaka, 560-0043, Japan.

<sup>5</sup>Department of Pharmaceutical Chemistry, School of Pharmacy, The University of Kansas, 2095 Constant Avenue, Lawrence, Kansas 66047, USA.

\*Co-corresponding authors: r.maharani@unpad.ac.id; siahaan@ku.edu.

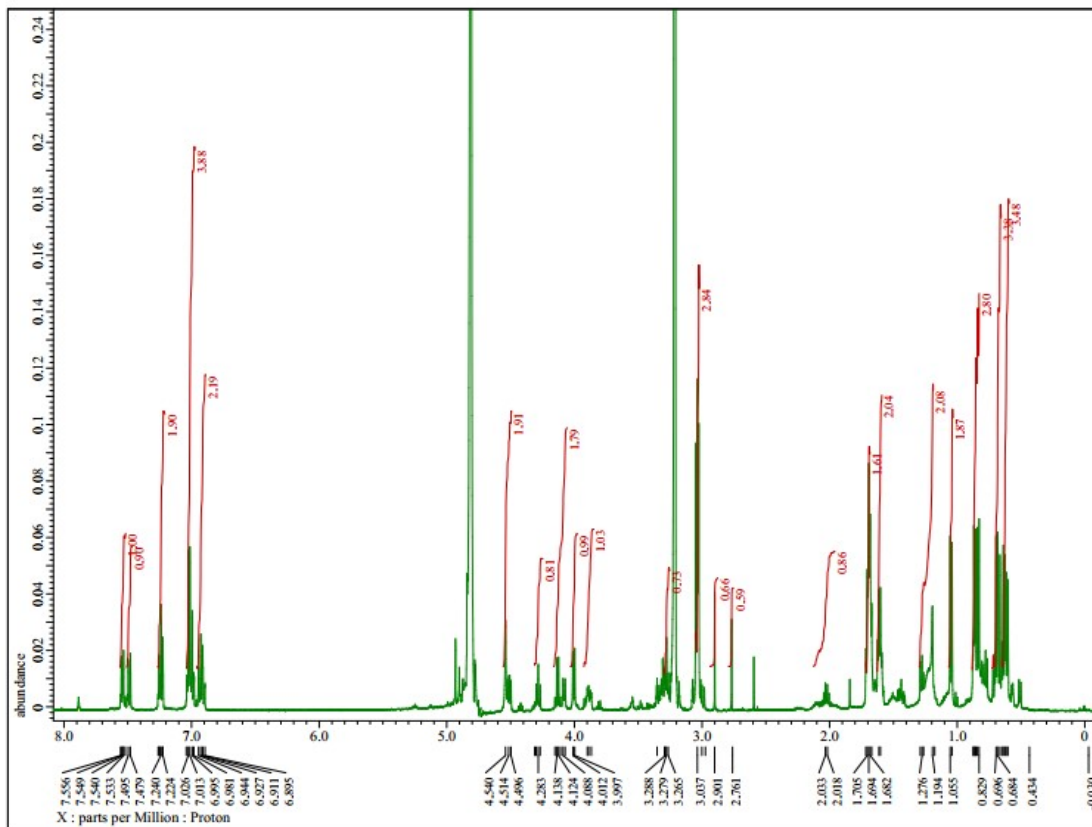

Figure S1. <sup>1</sup>H-NMR spectrum of Nocardiotide A.

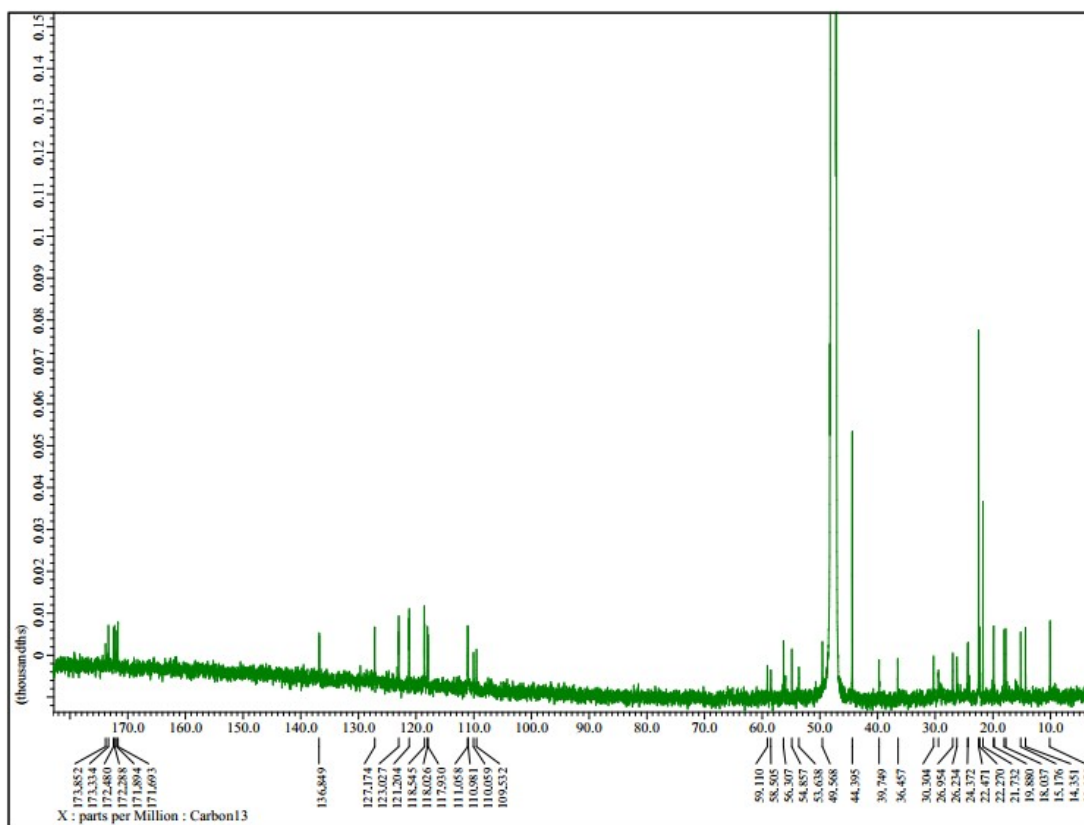

Figure S2. <sup>13</sup>C-NMR spectrum of Nocardiotide A.

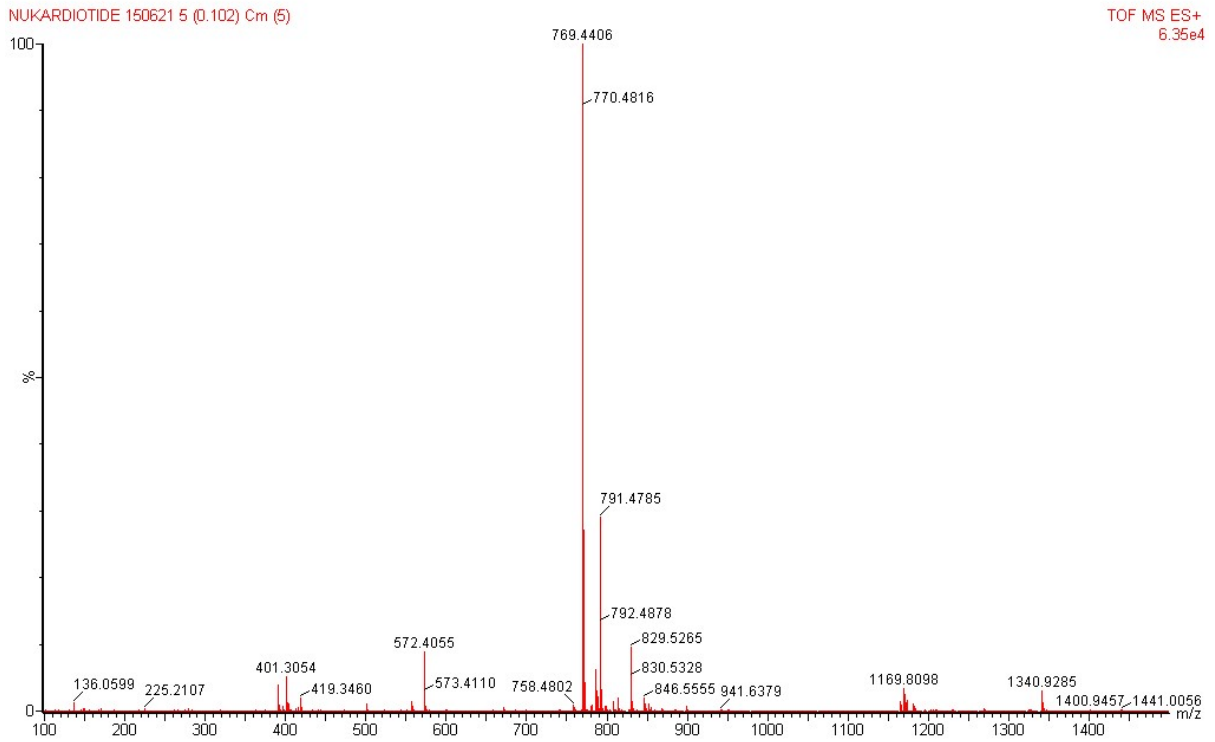

Figure S3. TOF-ESIMS spectrum of [D-Ala]-Nocardiotide

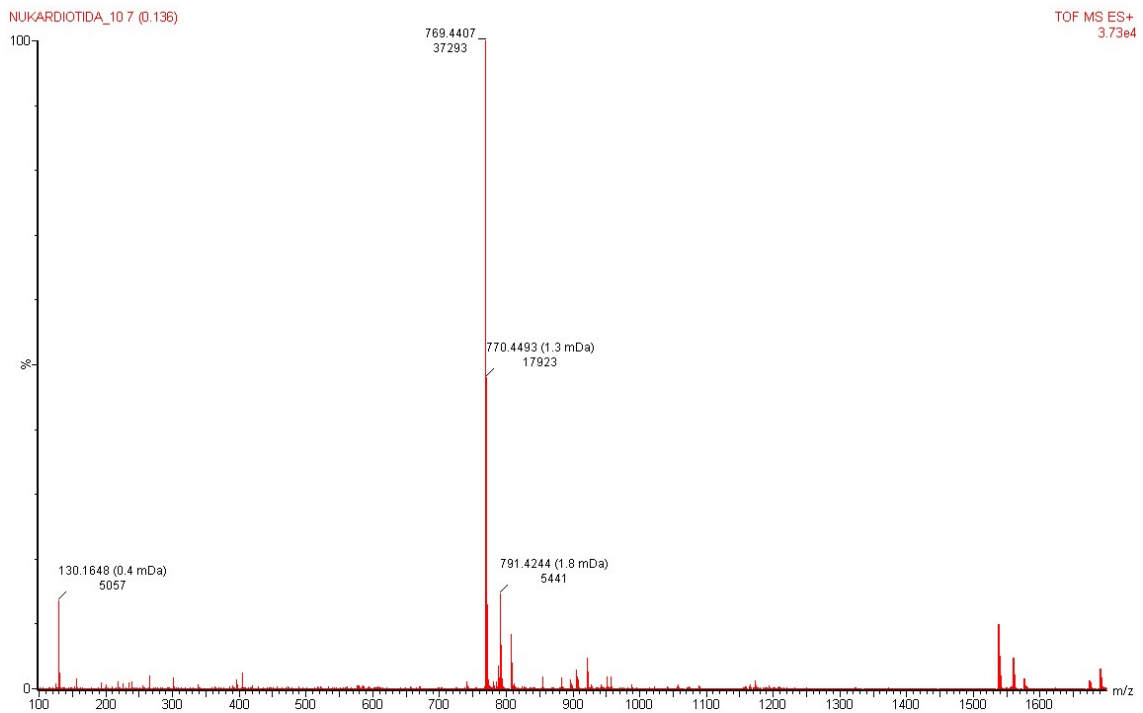

Figure S4. TOF-ESIMS spectrum of Nocardiotide A

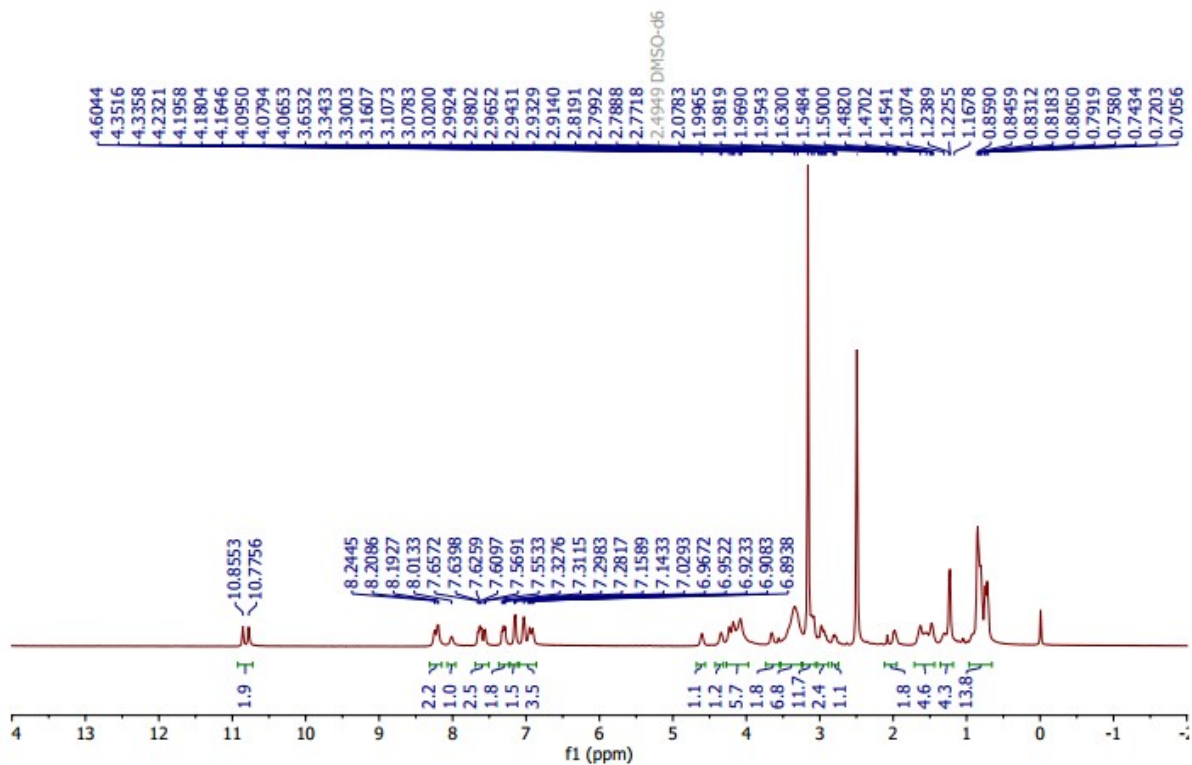

Figure S5.  $^1\text{H}$ -NMR spectrum of linear [D-Ala]-nocardiotide A.

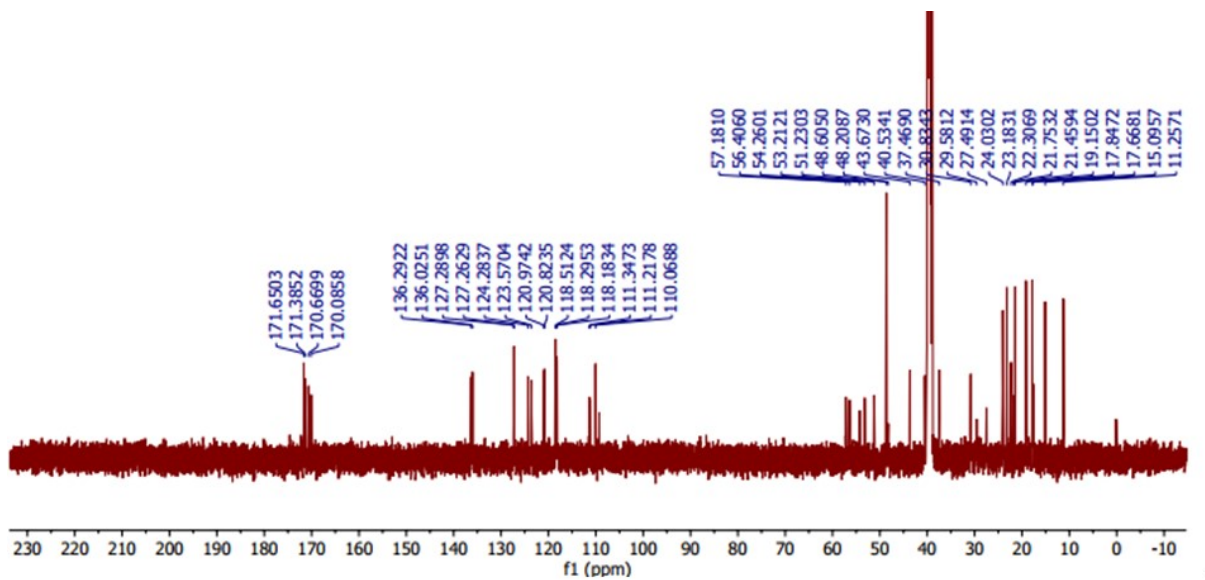

Figure S6.  $^{13}\text{C}$ -NMR spectrum of linear [D-Ala]-nocardiotide A.
